# Supplementary material
Source: PubMed Central journal article supplement (PMC5138106)

## S1 Appendix

The nucleotide and amino acid sequences of modified p65/Rela (p65mut)

>NFkB\_p65S276DS536A (p65mut)

CGGCCCCGCCCCGGGACCCTGACCATGGACGATCTGTTTCCCCTCATCTTTCCCTCAGAGCC  
AGCCCAGGCTTCTGGGCCTTATGTGGAGATCATCGAACAGCCGAAGCAACGGGGCATGCGA  
TTCCGCTATAAATGCGAGGGGCGCTCAGCGGGCAGTATTCTGGCGAGAGAAGCACAGATA  
CCACCAAGACACACCCACCATCAAGATCAATGGCTACACAGGACCAGGAACAGTTCGAAT  
CTCCCTGGTCACCAAGGATCCACCTACCGGCCTCATCCACATGAACTTGTGGGGAAGGACT  
GCCGGGATGGCTACTATGAGGCTGACCTCTGCCAGACCCGAGTATCCATAGCTTCCAGAAC  
CTGGGGATCCAGTGTGTGAAGAAGCGAGACCTGGAGCAAGCCATTAGCCAGCGAATCCAGA  
CCAACAATAACCCCTTTCACGTTCTATAGAGGAGCAGCGCGGGGACTATGACTTGAATGCA  
GTGCGCCTCTGCTTCCAGGTGACAGTGCGGGACCCAGCAGGCAGGCCCTCCTCCTGACCCC  
TGTCCTCTCACATCCGATTTTTGATAACCGGGCCCCAACACTGCCGAGCTCAAGATCTGCC  
GAGTAAACCGGAACTCTGGGAGCTGCCTCGGTGGGGATGAGATCTTCTTGTGTGCGACAAG  
GTGCAGAAAGAAGACATTGAGGTGTATTTACGGGACCAGGCTGGGAGGCACGAGGCTCCT  
TTTCTCAAGCTGATGTGCATCGGCAAGTGGCCATTGTGTTCCGGACTCCTCCGTACGCCGACC  
CCAGCCTCCAGGCTCCTGTTTCAGTCTCCATGCAGCTACGGCGGCCT **GAT** GATCGCGAGCTC  
AGTGAGCCCATGGAGTTCAGTACTTGCCAGACACAGATGATCGCCACCGGATTGAAGAGA  
AGCGCAAAGGACCTATGAGACCTTCAAGAGTATCATGAAGAAGAGTCCTTTCAATGGACC  
AACTGAACCCCGGCCTCCAACCCGGCGTATTGCTGTGCCTACCCGAAACTCAACTTCTGTCC  
CCAAGCCAGCCCCGCAGCCCTACACCTTCCCAGCATCCCTCAGCACCATCAACTTTGATGAG  
TTTTCCCCCATGCTGTTACCATCAGGGCAGATCTCAAACCAGGCCCTGGCCTTGGCACCGTCC  
TCTGCCCCAGTCCTTGCCAGACCATGGTCCCTTCCCTCAGCCATGGTACCTCTGGCTCAGCCC  
CCAGCTCCTGCCCCAGTTCTAACCCCGGGTCTCCTCCCCAGTCCCTGTCTGCACCTGTTCCAAAG  
AGCACCCAGGCTGGGGAAGGCACGCTGTCGGAAGCCCTGCTGCACCTGCAGTTTGTATGCTG  
ATGAAGACTTGGGGGCCTTGCTTGGCAACAGCACAGACCCAGGAGTGTTCACAGACCTGGC  
ATCTGTGGACAACTCAGAGTTTCAGCAGCTCCTGAACCAGGGTGTGTCCATGTCTCACTCCA  
CAGCTGAGCCCATGCTGATGGAGTACCCTGAAGCTATAACTCGCCTGGTGACAGGGTCCCAG  
AGGCCCTGACCCAGCTCCCACACCCCTGGGGACCTCGGGGCTTCCCAATGGTCTCTCAGG  
AGATGAAGACTTCTCC **GCC** ATTGCGGACATGGACTTCTCTGCTCTTTGAGTCAGATCAGCT  
CCTAAGGTGCTGACAGCGACCCTGCTCAGA

>The amino acid sequence of modified p65/Rela (p65mut)

MDDLFLIFPSEPAQASGPYVEIIEQPKQRGMRFRYKCEGRSAGSIPGERSTDTTKTHPTIKINGYT  
GPGTVRISLVTKDPPHRPHPHLVGKDCRDGYEADLCPDRSIHSFQNLGIQCVKKRDLEQAISQ  
RIQTNNNPFHVPIEEQRGDYDLNAVRLCFQVTVRDPAGRPLLLTPVLSHPIFDNRAPNTAELKICR  
VNRNSGSCLGGDEIFLLCDKVQKEDIEVYFTGPGWEARGSFQADVHRQVAIVFRTPPYADPSLQ  
APVRVSMQLRRP **D** DRELSEPMEFQYLPDTPDRHRIEKRKRKYETFKSIMKKSPFNPTPRPPT  
RRIAVPTRNSTSVPKPAPQPYTFPASLSTINFDEFSPMLLPSGQISNQALALAPSSAPVLAQTMVPS  
SAMVPLAQPPAPAPVLTGPPQSLAPVPKSTQAGEGTLSEALLHLQFDADEDLGALLGNSTDPG  
VFTDLASVDNSEFQQLLNQGVSMHSTAEPMLMEYPEAITRLVTGSQRPPDPAPTPLGTSGLPNG  
LSGDEDEF **A** IADMDFSALLSQISS

## S2 Appendix

Representative confocal images of beta-III Tubulin (Tubb3)-labeled ganglion cell layers (green) in flat-mounted retinas acquired at the center, middle, and peripheral regions in control (no surgery) and ONC retinas 14 days after surgery

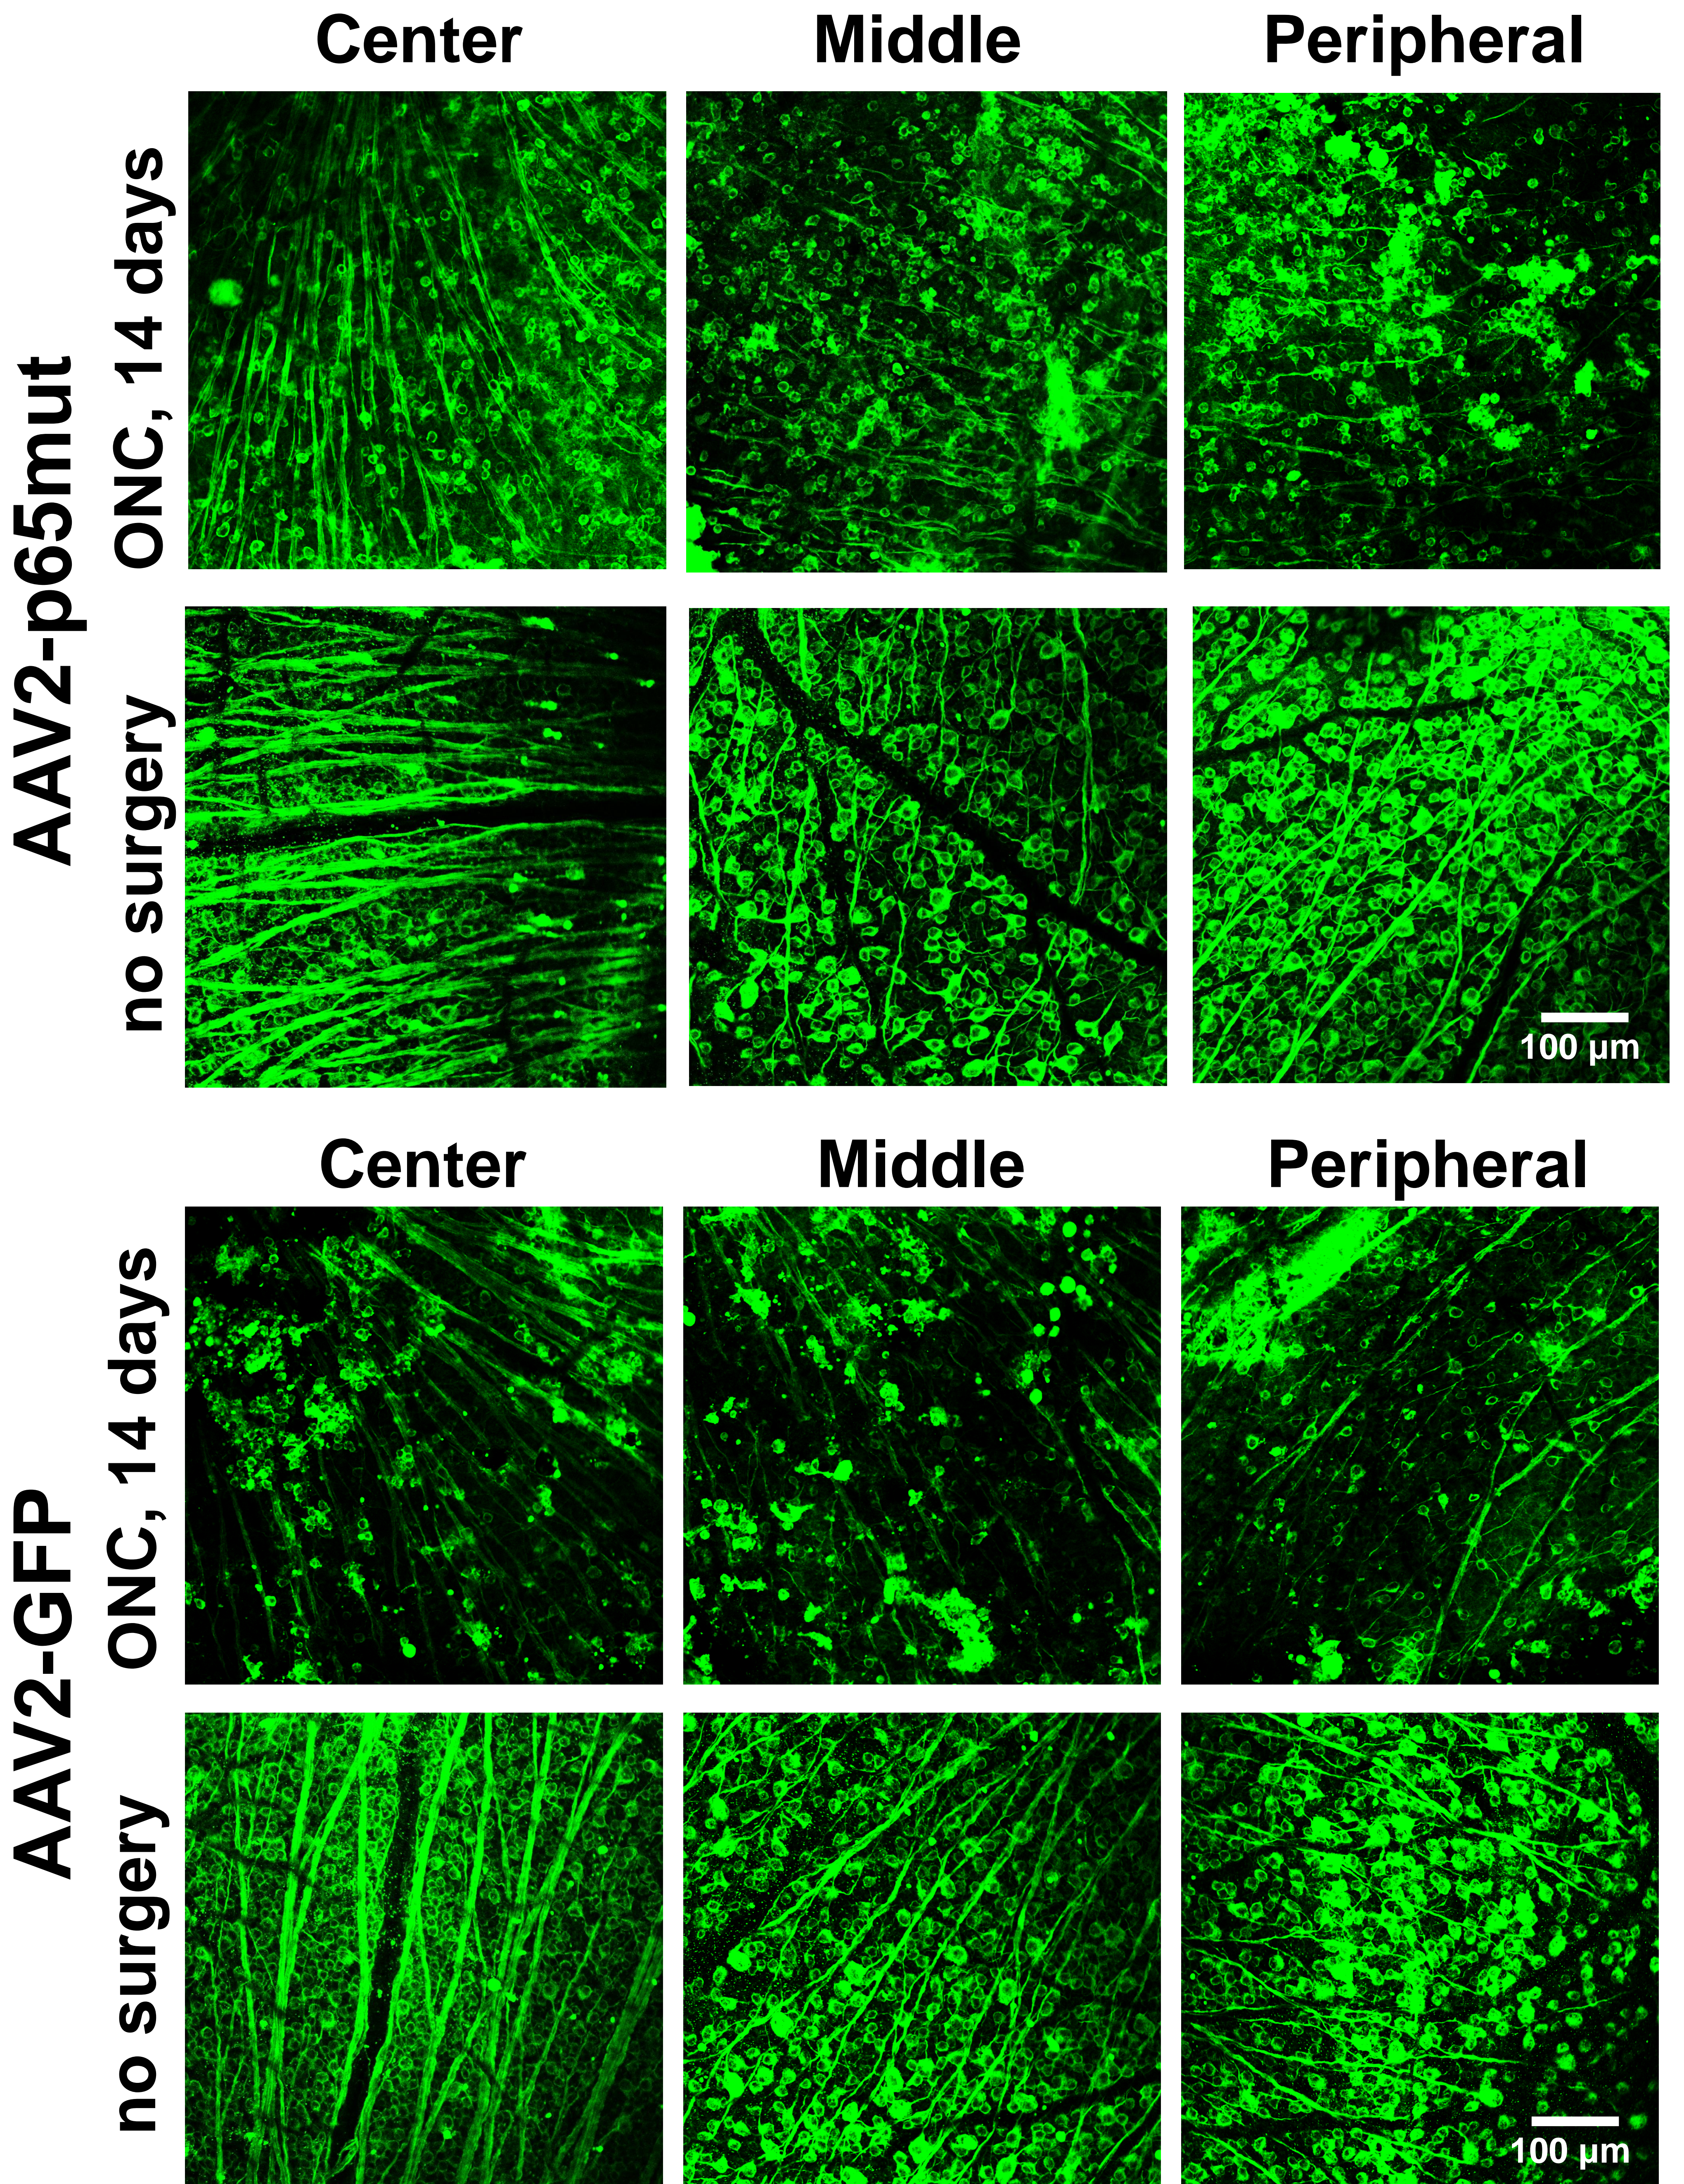

Supplement: NIHMS813692-supplement-Supp_info.pdf [file NIHMS813692-supplement-Supp_info.pdf]
